# Supplementary material for: Chiral Stationary Phases for Liquid Chromatography: Recent Developments
Source: PubMed Central journal article supplement (PMC6429359; doi:10.3390/molecules24050865), 2019-02-28
Supplement: molecules-24-00865-s001.pdf [file molecules-24-00865-s001.pdf]

# Supplementary Material

## Chiral stationary phases for liquid chromatography: recent developments

Joana Teixeira<sup>1</sup>, Maria Elizabeth Tiritan<sup>1,2,3</sup>, Madalena M. M. Pinto<sup>1,2</sup>, Carla Fernandes<sup>1,2\*</sup>

<sup>1</sup> Laboratório de Química Orgânica e Farmacêutica, Departamento de Ciências Químicas, Faculdade de Farmácia, Universidade do Porto, Rua de Jorge Viterbo Ferreira, 228, 4050-313 Porto, Portugal; jkteixeira@live.com.pt (J.T.); elizabeth.tiritan@iucs.cespu.pt (M.E.T.); madalena@ff.up.pt (M.M.M.P.)

<sup>2</sup> Interdisciplinary Centre of Marine and Environmental Research (CIIMAR), Edifício do Terminal de Cruzeiros do Porto de Leixões, Av. General Norton de Matos s/n, 4050-208 Matosinhos, Portugal

<sup>3</sup> Cooperativa de Ensino Superior, Politécnico e Universitário (CESPU), Instituto de Investigação e Formação Avançada em Ciências e Tecnologias da Saúde (IINFACETS), Rua Central de Gandra, 1317, 4585-116 Gandra PRD, Portugal

\* Correspondence: cfernandes@ff.up.pt (C.F.); Tel.: +351-22-042-8688

**Table S1.** Recent developments of polysaccharide-based CSPs.

| CSP      | Analytes                                                                                                                                                                                                                                                                                                                                                                                                                                                                                                                                                                                             | Mobile phase (% v/v)                 | Separation factor ( $\alpha$ ) | Resolution factor ( $R_s$ ) | Retention factor ( $k_1$ ) | Reference |
|----------|------------------------------------------------------------------------------------------------------------------------------------------------------------------------------------------------------------------------------------------------------------------------------------------------------------------------------------------------------------------------------------------------------------------------------------------------------------------------------------------------------------------------------------------------------------------------------------------------------|--------------------------------------|--------------------------------|-----------------------------|----------------------------|-----------|
| CSP1-2   | 1-(9- Anthryl)-2,2,2-trifluoroethanol, <i>trans</i> -stilbene oxide, Tröger's base, benzoin, 2-phenylcyclohexanone and flavanone                                                                                                                                                                                                                                                                                                                                                                                                                                                                     | HEX:IPA (90:10)                      | 1.11-1.64                      | 1.67-7.60                   | 1.08-8.14                  | [94]      |
|          |                                                                                                                                                                                                                                                                                                                                                                                                                                                                                                                                                                                                      | HEX:CHCl <sub>3</sub> :IPA (90:10:1) | 1.12-1.84                      | 2.17-9.59                   | 1.31-9.21                  |           |
|          |                                                                                                                                                                                                                                                                                                                                                                                                                                                                                                                                                                                                      | HEX:THF:IPA (90:10:1)                | 1.08-1.44                      | 1.19-6.27                   | 1.37-11.3                  |           |
| CSP3-27  | Aromatic and cyclic compounds                                                                                                                                                                                                                                                                                                                                                                                                                                                                                                                                                                        | HEX:IPA (90:10)                      | 1.02-2.87                      | -                           | 0.22-26.6                  | [100]     |
| CSP28-35 | Tröger base; 2-phenylchroman-4-one; 1-(2-naphthyl)-ethanol; methyl phenyl sulfoxide; 1-phenylethanol; mephobarbital; 4-phenyloxazolidin-2-one; 1-(1-phenylethyl)-3-( <i>p</i> -tolyl)urea; 1-(2,4-dichlorophenyl)-2-(1 <i>H</i> -imidazol-1-yl)ethanol; benzoin; 1-(1-(4-methoxyphenyl)ethyl)-3-phenylurea; aminoglutethimide; glutethimide; citalopram hydrobromide; efavirenz; <i>N</i> -(1-(4-methoxyphenyl)ethyl)-3,5-dinitrobenzamide; voriconazole; 4-(4-(dimethylamino)-1-(4-fluorophenyl)-1-hydroxybutyl)-3-(hydroxymethyl)benzoxonitrile                                                    | HEX:IPA (90:10)                      | 1.04-3.76                      | 0.17-10.3                   | 0.38-26.1                  | [97]      |
|          |                                                                                                                                                                                                                                                                                                                                                                                                                                                                                                                                                                                                      | HEX:EtOH (90:10)                     | 1.02-6.72                      | 0.25-18.1                   | 0.34-32.5                  |           |
|          |                                                                                                                                                                                                                                                                                                                                                                                                                                                                                                                                                                                                      | HEX:EtOH:MeOH (90:5:5)               | 1.06-2.69                      | 0.24-16.2                   | 0.32-23.5                  |           |
| CSP36-42 | Tröger base; 2-phenylchroman-4-one; 1-(2-naphthyl)-ethanol; methyl phenyl sulfoxide; 1-phenylethanol; mephobarbital; 4-phenyloxazolidin-2-one; 1-(1-phenylethyl)-3-( <i>p</i> -tolyl)urea; 1-(2,4-dichlorophenyl)-2-(1 <i>H</i> -imidazol-1-yl)ethanol; 4-methyl- <i>N</i> -(1-phenylethyl)benzamide; benzoin; 1-(1-(4-methoxyphenyl)ethyl)-3-phenylurea; aminoglutethimide; citalopram hydrobromide; efavirenz; <i>N</i> -(1-(4-methoxyphenyl)ethyl)-3,5-dinitrobenzamide; omeprazole sodium; voriconazole; 4-(4-(dimethylamino)-1-(4-fluorophenyl)-1-hydroxybutyl)-3-(hydroxymethyl)benzoxonitrile | HEX:IPA (90:10)                      | 1.03-3.16                      | 0.21-14.1                   | 2.49-33.2                  | [95]      |
|          |                                                                                                                                                                                                                                                                                                                                                                                                                                                                                                                                                                                                      | HEX:EtOH (90:10)                     | 1.04-8.64                      | 0.23-11.6                   | 1.70-36.5                  |           |
|          |                                                                                                                                                                                                                                                                                                                                                                                                                                                                                                                                                                                                      | HEX:EtOH:MeOH (90:5:5)               | 1.02-5.38                      | 0.22-10.0                   | 1.48-21.7                  |           |
| CSP43-48 | Tröger base; 2-phenylchroman-4-one; 1-(2-naphthyl)-ethanol; methyl phenyl sulfoxide; 1-phenylethanol; mephobarbital; 4-phenyloxazolidin-2-one; 1-(1-phenylethyl)-3-( <i>p</i> -tolyl)urea; 1-(2,4-dichlorophenyl)-2-(1 <i>H</i> -imidazol-1-yl)ethanol; 4-methyl- <i>N</i> -(1-phenylethyl)benzamide; benzoin; 1-(1-(4-methoxyphenyl)ethyl)-3-phenylurea; aminoglutethimide; citalopram hydrobromide; efavirenz; <i>N</i> -(1-(4-methoxyphenyl)ethyl)-3,5-dinitrobenzamide; omeprazole sodium; voriconazole; 4-(4-(dimethylamino)-1-(4-fluorophenyl)-1-hydroxybutyl)-3-(hydroxymethyl)benzoxonitrile | HEX:IPA (90:10)                      | 1.04-4.32                      | 0.10-8.05                   | 0.28-47.3                  | [96]      |
|          |                                                                                                                                                                                                                                                                                                                                                                                                                                                                                                                                                                                                      | HEX:EtOH (90:10)                     | 1.03-2.42                      | 0.17-7.75                   | 0.24-28.0                  |           |
|          |                                                                                                                                                                                                                                                                                                                                                                                                                                                                                                                                                                                                      | HEX:EtOH:MeOH (90:5:5)               | 1.05-3.12                      | 0.14-11.9                   | 0.28-20.0                  |           |
| CSP49-51 | Taladafil                                                                                                                                                                                                                                                                                                                                                                                                                                                                                                                                                                                            | HEX:EtOH 80:20                       | 1.42-2.15                      | 2.08-4.72                   | 2.87-12.7                  | [102]     |
|          |                                                                                                                                                                                                                                                                                                                                                                                                                                                                                                                                                                                                      | 90:10                                | 1.07-1.81                      | 0.10-2.55                   | 1.86-37.9                  |           |
| CSP52-55 | <i>trans</i> -Stilbene oxide; 2,2-dihydroxy-6,6-dimethylbiphenyl;                                                                                                                                                                                                                                                                                                                                                                                                                                                                                                                                    | HEX:IPA (90:10)                      | 1.04-3.06                      | 0.24-11.7                   | 0.43-25.6                  | [101]     |

|       |                                                                                                                                                                                                                                                                                                                                                                                                                                                                                                                                                                                                   |                                      |           |            |            |           |
|-------|---------------------------------------------------------------------------------------------------------------------------------------------------------------------------------------------------------------------------------------------------------------------------------------------------------------------------------------------------------------------------------------------------------------------------------------------------------------------------------------------------------------------------------------------------------------------------------------------------|--------------------------------------|-----------|------------|------------|-----------|
|       | benzoin; 2-phenyl-cyclohexanone; tröger base; 1-(9-anthryl)-2,2,2-tri-fluoroethanol; cobalt(III) <i>tris</i> (acetylacetonate); 1,2,2,2-tetraphenylethanol; flavanone; <i>trans</i> -cyclopropanedicarboxylic acid dianilide                                                                                                                                                                                                                                                                                                                                                                      | HEX:EtOH (90:10:1)                   | 1.04-2.31 | 0.10-10.6  | 0.31-23.9  |           |
|       |                                                                                                                                                                                                                                                                                                                                                                                                                                                                                                                                                                                                   | HEX:EtOH:MeOH (90:5:5)               | 1.03-1.98 | 0.19-9.03  | 0.32-21.1  |           |
|       |                                                                                                                                                                                                                                                                                                                                                                                                                                                                                                                                                                                                   | HEX:CHCl <sub>3</sub> :IPA (90:10:1) | 1.12-1.84 | 2.17-9.59  | 1.31-9.21  |           |
|       |                                                                                                                                                                                                                                                                                                                                                                                                                                                                                                                                                                                                   | HEX:THF:IPA (90:10:1)                | 1.08-1.44 | 1.19-6.27  | 1.37-11.3  |           |
|       |                                                                                                                                                                                                                                                                                                                                                                                                                                                                                                                                                                                                   | HEX:IPA (90:10)                      | 1.06-4.32 | 0.03-6.75  | 0.25-15.0  |           |
| CSP56 | Tröger base; 2-phenylchroman-4-one; 1-(2-naphthyl)-ethanol; methyl phenyl sulfoxide; 1-phenylethanol; mephobarbital; 4-phenyloxazolidin-2-one; 1-(1-phenylethyl)-3-( <i>p</i> -tolyl)urea; 1-(2,4-dichlorophenyl)-2-(1 <i>H</i> -imidazol-1-yl)ethanol; 4-methyl- <i>N</i> -(1-phenylethyl)benzamide; benzoin; 1-(1-(4-methoxyphenyl)ethyl)-3-phenylurea; aminoglutethimide; citalopram hydrobromide; efavirenz; <i>N</i> -(1-(4-methoxyphenyl)ethyl)-3,5-dinitrobenzamide; omeprazole sodium; voriconazole; 4-(4-(dimethylamino)-1-(4-fluorophenyl)-1-hydroxybutyl)-3-(hydroxymethyl)benzotriole | HEX:EtOH (90:10)                     | 1.07-3.59 | 0.11-8.49  | 0.17-4.96  | [98]      |
|       |                                                                                                                                                                                                                                                                                                                                                                                                                                                                                                                                                                                                   | 30:70                                | 1.20-2.90 | 0.77-2.80  | -          |           |
|       |                                                                                                                                                                                                                                                                                                                                                                                                                                                                                                                                                                                                   | 30:70 with 1% TFA                    | 1.20-1.86 | <1.00-1.66 | -          |           |
|       |                                                                                                                                                                                                                                                                                                                                                                                                                                                                                                                                                                                                   | 40:60                                | 1.09-3.80 | <1.00-2.66 | -          |           |
|       |                                                                                                                                                                                                                                                                                                                                                                                                                                                                                                                                                                                                   | 50:50                                | 1.10-1.52 | <1.00-2.00 | -          | [103]     |
|       |                                                                                                                                                                                                                                                                                                                                                                                                                                                                                                                                                                                                   | 80:20                                | 1.06-1.34 | <1.00-1.32 | -          |           |
|       |                                                                                                                                                                                                                                                                                                                                                                                                                                                                                                                                                                                                   | 90:10                                | 1.35-1.49 | 0.99-1.30  | -          |           |
|       |                                                                                                                                                                                                                                                                                                                                                                                                                                                                                                                                                                                                   | ACN:H <sub>2</sub> O (10:90)         | 1.13-2.80 | <1.00-2.30 | -          |           |
|       |                                                                                                                                                                                                                                                                                                                                                                                                                                                                                                                                                                                                   | 50:50                                | 1.20-1.90 | <1.00-2.10 | -          |           |
|       |                                                                                                                                                                                                                                                                                                                                                                                                                                                                                                                                                                                                   | HEX:IPA                              | 90:10     | 1.11-2.00  | <1.00-2.40 | -         |
|       |                                                                                                                                                                                                                                                                                                                                                                                                                                                                                                                                                                                                   | 90:10 with TFA                       | 1.10-1.90 | <1.00-2.00 | -          |           |
|       |                                                                                                                                                                                                                                                                                                                                                                                                                                                                                                                                                                                                   | 98:2                                 | 1.18-8.42 | 1.23-1.88  | 0.49-1.57  |           |
|       |                                                                                                                                                                                                                                                                                                                                                                                                                                                                                                                                                                                                   | 95:5                                 | 1.38-7.60 | 0.72-1.61  | 0.32-1.72  |           |
|       |                                                                                                                                                                                                                                                                                                                                                                                                                                                                                                                                                                                                   | 90:10                                | 1.12-8.11 | 0.41-2.10  | 0.35-7.90  |           |
|       |                                                                                                                                                                                                                                                                                                                                                                                                                                                                                                                                                                                                   | 85:15                                | 4.02-4.44 | 1.03-1.25  | 0.31-1.51  |           |
|       |                                                                                                                                                                                                                                                                                                                                                                                                                                                                                                                                                                                                   | HEX:IPA                              | 80:20     | 1.20-4.78  | 0.73-1.60  | 1.11-3.25 |
|       |                                                                                                                                                                                                                                                                                                                                                                                                                                                                                                                                                                                                   | 70:30                                | 1.20-3.52 | 0.55-1.04  | 0.48-3.32  | [99]      |
|       |                                                                                                                                                                                                                                                                                                                                                                                                                                                                                                                                                                                                   | 60:40                                | 3.03-3.28 | 1.60-1.77  | 0.37-1.21  |           |
|       |                                                                                                                                                                                                                                                                                                                                                                                                                                                                                                                                                                                                   | 50:50                                | 1.74-3.13 | 1.23-2.61  | 0.73-0.99  |           |
|       |                                                                                                                                                                                                                                                                                                                                                                                                                                                                                                                                                                                                   | 40:60                                | 7.00      | 1.62       | 0.18       |           |
| CSP59 | Etazolone, 2-benzylsulfinyl benzamide, 2-(3-                                                                                                                                                                                                                                                                                                                                                                                                                                                                                                                                                      | MeOH                                 | 2.10-15.3 | 2.0-11.0   | 0.09-0.27  | [106]     |

bromobenzylsulfinyl)-benzamide, 2-(4-methylbenzylsulfinyl)-benzamide, 2-(benzylsulfinyl)-*N,N*-dimethyl benzamide, 2-(benzylsulfinyl)-*N*-methyl benzamide, 2-(2-methylbenzylsulfinyl)-benzamide, 2-(3-methylbenzylsulfinyl)-benzamide

|              |                                                                                                  |         |                               |           |   |           |       |
|--------------|--------------------------------------------------------------------------------------------------|---------|-------------------------------|-----------|---|-----------|-------|
| <b>CSP60</b> | 2,2,2-Trifluoro-1-(9-anthryl)ethanol; benzoin; methyl mandelate;<br><i>trans</i> -stilbene oxide | HEX:IPA | 95:5                          | 1.96-2.41 | - | 0.94-4.12 | [108] |
|              |                                                                                                  |         | 98:2                          | 1.27-1.49 | - | 9.05-10.2 |       |
| <b>CSP61</b> | Omeprazole                                                                                       |         | MeOH:H <sub>2</sub> O (40:60) | 3.10      | - | 1.00      | [110] |

ACN: acetonitrile; DEA: diethylamine; HEX: *n*-hexane; EtOH: ethanol; IPA: 2-propanol; MeOH: methanol; TFA: trifluoroacetic acid; THF: tetrahydrofuran.

**Table S1.** Recent developments of protein-based CSPs.

| CSP             | Analytes                                                                  | Mobile phase (% <i>v/v</i> )                                             | Affinity constant (K <sub>a</sub> ; M <sup>-1</sup> ) | Resolution factor (R <sub>s</sub> ) | Retention factor (k <sub>1</sub> ) | Reference |
|-----------------|---------------------------------------------------------------------------|--------------------------------------------------------------------------|-------------------------------------------------------|-------------------------------------|------------------------------------|-----------|
| <b>CSP62-64</b> | Benzoin; ibuprofen; chlorpheniramine; propranolol; oxprenolol             | DiPO <sub>4</sub> - DiNaPO <sub>4</sub> (pH 5.1):EtOH (90:10)            | -                                                     | 0.59-14.2                           | 3.42-38.6                          | [126]     |
| <b>CSP65-66</b> | Carbamazepine; disopyramide; imipramine; lidocaine; <i>S</i> -propranolol | 0.10 M potassium PBS (pH 5.0)                                            | 6.40×10 <sup>4</sup> -<br>2.10×10 <sup>6</sup>        | -                                   | 2.10-69.4                          | [124]     |
| <b>CSP67</b>    | Propranolol, alprenolol, oxprenolol, pindolol                             | 20 mM sodium DiPO <sub>4</sub> - DiNaPO <sub>4</sub> (pH 6.8):IPA (95:5) | -                                                     | 0.97-10.7                           | 0.41-34.6                          | [128]     |
| <b>CSP68</b>    | Warfarin, verapamil, carbamazepine                                        | 0.067 M PBS (pH 7.4)                                                     | 5.30×10 <sup>3</sup> -<br>2.60×10 <sup>5</sup>        | 0.61-1.39                           | 4.20-233                           | [130]     |
| <b>CSP69</b>    | Disopyramide, chlorpromazine, imipramine, propranolol, warfarin           | 0.067 M PBS (pH 7.4)                                                     | 0.26×10 <sup>4</sup> -<br>90.0×10 <sup>6</sup>        | -                                   | 0.54-14.1                          | [131]     |
| <b>CSP70</b>    | Ketoprofen, fenoprofen, indoprofen, ibuprofen, flurbiprofen               | MeOH:potassium DiPO <sub>4</sub> (pH 4.5) (50:50)                        | -                                                     | 0.79-2.14                           | 1.80-17.9                          | [133]     |
| <b>CSP71-72</b> | Warfarin, tryptophan                                                      | 0.067 M PBS (pH 7.4)                                                     | -                                                     | 1.49-4.52                           | 1.49-121                           | [125]     |

DiNaPO<sub>4</sub>: disodium hydrogen phosphate; DiPO<sub>4</sub>: dihydrogen phosphate; EtOH: ethanol; IPA: 2-propanol; MeOH: methanol; PBS: phosphate buffer.

**Table S2.** Recent developments of cyclodextrin-based CSPs.

| CSP           | Analytes                                                                                                                                                                                                                                                                                                                   | Mobile phase (% v/v)                | Separation factor ( $\alpha$ ) | Resolution factor (Rs) | Retention factor ( $k_1$ ) | Reference |       |
|---------------|----------------------------------------------------------------------------------------------------------------------------------------------------------------------------------------------------------------------------------------------------------------------------------------------------------------------------|-------------------------------------|--------------------------------|------------------------|----------------------------|-----------|-------|
| CSP73         | Flavanone; 4'-hydroxyflavanone; 6-hydroxyflavanone; 1-( <i>p</i> -tolyl)but-3-en-1-ol; <i>trans</i> -1,3-diphenyl-2-propen-1-ol; 3-(4-methoxyphenyl)-5-phenyl-4,5-dihydro-1,2-oxazole; 1-(3-( <i>p</i> -tolyl)-4,5-dihydroisoxazol-5-yl)pyrrolidine-2-one; 1-(3-(3-nitrophenyl)-4,5-dihydroisoxazol-5-yl)pyrrolidine-2-one | MeOH:H <sub>2</sub> O               | 60:40                          | 1.18-2.24              | 0.98-4.17                  | 1.02-7.85 | [152] |
|               | 3'-Hydroxyflavanone; 6-methoxyflavanone; 7-methoxyflavanone; 1-(3-(4-chlorophenyl)-4,5-dihydroisoxazol-5-yl)pyrrolidine-2-one                                                                                                                                                                                              |                                     | 70:30                          | 1.75-2.39              | 3.02-4.40                  | 1.11-7.63 |       |
|               | 1-(4-Chlorophenyl)ethanol; 1-(4-bromophenyl)ethanol                                                                                                                                                                                                                                                                        |                                     | 90:10                          | 1.38-1.64              | 0.71-0.88                  | 0.12-0.27 |       |
| CSP74         | Naringenin                                                                                                                                                                                                                                                                                                                 | MeOH:5%TEAA buffer (pH 4.0) (70:30) |                                | 1.17                   | 0.61                       | 1.23-1.44 | [151] |
|               | Flavonoids, $\beta$ -blockers and isoxazolines                                                                                                                                                                                                                                                                             |                                     | 60:40                          | 1.01-1.29              | 0.20-1.96                  | 2.70-9.47 |       |
|               |                                                                                                                                                                                                                                                                                                                            |                                     | 70:30                          | 1.03-1.70              | 0.25-6.03                  | 1.26-3.71 |       |
|               |                                                                                                                                                                                                                                                                                                                            |                                     | 80:20                          | 1.05-1.70              | 0.67-5.93                  | 1.15-5.61 |       |
| CSP75         | Flavonoids, aromatic alcohols, acidic drugs, $\beta$ -blocker, and amino acids.                                                                                                                                                                                                                                            | MeOH                                |                                | 1.09-1.83              | 0.64-8.07                  | -         | [159] |
|               |                                                                                                                                                                                                                                                                                                                            | MeOH:H <sub>2</sub> O (10:90)       |                                | 1.08                   | 1.68                       | -         |       |
|               |                                                                                                                                                                                                                                                                                                                            | MeOH:TEAA (1% pH 4.0)               |                                | 1.06-2.24              | 0.76-4.32                  | -         |       |
|               |                                                                                                                                                                                                                                                                                                                            | MeOH:TEAA (1% pH 5.0)               |                                | 1.08                   | 1.06                       | -         |       |
|               |                                                                                                                                                                                                                                                                                                                            | HEX:EtOH                            | 60:40                          | 1.19-2.37              | 1.90-5.09                  | -         |       |
|               |                                                                                                                                                                                                                                                                                                                            |                                     | 70:30                          | 1.22-2.55              | 2.10-7.32                  | -         |       |
|               |                                                                                                                                                                                                                                                                                                                            |                                     | 80:20                          | 1.26-2.71              | 2.35-7.84                  | -         |       |
|               |                                                                                                                                                                                                                                                                                                                            | HEX:IPA                             | 90:10                          | 1.34-2.60              | 3.73-8.50                  | -         |       |
|               |                                                                                                                                                                                                                                                                                                                            |                                     | 60:40                          | 1.23-2.71              | 2.27-5.09                  | -         |       |
|               |                                                                                                                                                                                                                                                                                                                            |                                     | 70:30                          | 1.26-2.75              | 2.44-5.08                  | -         |       |
|               |                                                                                                                                                                                                                                                                                                                            |                                     | 80:20                          | 1.32-2.76              | 2.69-5.29                  | -         |       |
|               |                                                                                                                                                                                                                                                                                                                            |                                     | 90:10                          | 1.37-2.73              | 2.91-5.27                  | -         |       |
|               |                                                                                                                                                                                                                                                                                                                            |                                     | 90:5:5                         | 1.36-2.12              | 5.46-9.84                  | -         |       |
| 80:10:10      | 1.44-2.41                                                                                                                                                                                                                                                                                                                  |                                     | 3.85-8.85                      | -                      |                            |           |       |
| HEX:MeOH:EtOH | 70:15:15                                                                                                                                                                                                                                                                                                                   | 1.40-2.26                           | 3.34-8.22                      | -                      |                            |           |       |
|               | 60:20:20                                                                                                                                                                                                                                                                                                                   | 1.37-2.14                           | 3.02-7.95                      | -                      |                            |           |       |

|          |                                                                                                     |                               |                                      |           |           |            |       |
|----------|-----------------------------------------------------------------------------------------------------|-------------------------------|--------------------------------------|-----------|-----------|------------|-------|
|          |                                                                                                     |                               | 90:5:5                               | 1.42-2.13 | 5.35-8.52 | -          |       |
|          |                                                                                                     | HEX:MeOH:IPA                  | 80:10:10                             | 1.45-2.46 | 3.56-8.06 | -          |       |
|          |                                                                                                     |                               | 70:15:15                             | 1.42-2.29 | 3.04-7.48 | -          |       |
|          |                                                                                                     |                               | 60:20:20                             | 1.38-2.14 | 2.71-7.37 | -          |       |
| CSP76    | Carvedilol                                                                                          | ACN:MeOH:AcOH:TEA             | (99:1:2:1.8)                         | 1.30      | 1.97      | 8.20-10.7  | [149] |
|          | Atenolol                                                                                            |                               | (90:10:1:0.9)                        | 1.15      | 1.62      | 9.60-11.1  |       |
|          | Metoprolol                                                                                          |                               | (95:5:0.5:0.4)                       | 1.17      | 1.67      | 7.31-8.58  |       |
|          | Esmolol                                                                                             |                               | (95:5:0.4:0.4)                       | 1.18      | 1.69      | 6.28-7.38  |       |
|          | Propranolol                                                                                         |                               | (95:5:0.5:0.5)                       | 1.16      | 1.48      | 6.79-7.87  |       |
|          | Arotinolol; carteolol; bisoprolol                                                                   |                               | (90:10:1:1)                          | 1.07-1.14 | 0.52-1.45 | 4.70-8.40  |       |
|          | Pindolol                                                                                            |                               | (99:1:1:0.8)                         | 1.05      | <0.50     | 5.36-5.63  |       |
| CSP77-80 | Neutral, basic, and acidic analytes                                                                 | 0.50% NH <sub>4</sub> Ac:MeOH | 100:0                                | 1.14-2.90 | 1.98-7.01 | 1.37-10.41 | [160] |
|          |                                                                                                     |                               | 95:5                                 | 1.19      | 1.96      | 7.81       |       |
|          |                                                                                                     |                               | 90:10                                | 5.97      | 9.56      | 0.42       |       |
|          |                                                                                                     |                               | 80:20                                | 1.10-1.35 | 0.67-3.98 | 1.98-7.49  |       |
|          |                                                                                                     |                               | 70:30                                | 1.17-1.25 | 1.13-1.75 | 1.19-4.14  |       |
|          |                                                                                                     |                               | 60:40                                | 1.10      | 0.95      | 8.72       |       |
|          |                                                                                                     |                               | 20:80                                | 6.08      | 6.70      | 0.19       |       |
| CSP81-85 | Nine Cyclic and aromatic compounds                                                                  | HEX:IPA (90:10)               |                                      | 1.13-2.87 | -         | 0.25-5.47  | [148] |
| CSP86-88 | $\beta$ -Nitroethanol and derivatives, aromatic alcohols, amino acids derivatives, and chiral drugs | ACN:MeOH:AcOH:TEA             | 480:20:0.5:1                         | 1.01-5.18 | 0.39-22.0 | 0.39-9.99  | [150] |
|          |                                                                                                     |                               | 480:20:1:1                           | 1.04-15.5 | 0.50-21.2 | 0.37-8.03  |       |
|          |                                                                                                     |                               | 480:20:1:0.5                         | 1.05-3.36 | 0.55-12.4 | 1.44-6.77  |       |
|          |                                                                                                     | MeOH:H <sub>2</sub> O (50:50) |                                      | 1.07-2.06 | 0.72-5.78 | 1.60-14.0  |       |
| CSP89-92 | Isoxazoline derivatives, flavonoids, dansyl amino acids, styrene oxide, and Tröger's base           | MeOH:H <sub>2</sub> O         | 30:70                                | 1.05-3.30 | 1.00-7.15 | 0.39-12.2  | [161] |
|          |                                                                                                     |                               | 60:40                                | 1.12      | 3.55      | 8.12-9.08  |       |
|          |                                                                                                     |                               | 80:20                                | 1.11-1.21 | 2.46-3.05 | 1.60-3.84  |       |
|          |                                                                                                     |                               | 70:30                                | 1.05-2.04 | 0.94-7.06 | 0.69-9.84  |       |
|          |                                                                                                     |                               | 25:75                                | 1.08-1.12 | 2.01-3.11 | 2.70-3.86  |       |
|          |                                                                                                     |                               | MeOH:1% TEAA buffer (pH 4.9) (70:30) | 1.04-1.33 | 0.04-3.36 | 0.95-7.51  |       |
|          |                                                                                                     |                               | 15:85                                | 1.03-1.08 | 0.82-1.82 | 1.49-5.93  |       |
|          | ACN:H <sub>2</sub> O                                                                                |                               | 30:70                                | 1.05-2.28 | 1.13-3.30 | 0.15-11.6  |       |
|          |                                                                                                     |                               | 10:90                                | 1.01-1.03 | 0.19-1.05 | 7.54-11.8  |       |

|          |                                                                                                                                                                                                                                                                                                                                                                |                                                              |                                |           |           |           |       |
|----------|----------------------------------------------------------------------------------------------------------------------------------------------------------------------------------------------------------------------------------------------------------------------------------------------------------------------------------------------------------------|--------------------------------------------------------------|--------------------------------|-----------|-----------|-----------|-------|
|          |                                                                                                                                                                                                                                                                                                                                                                |                                                              | 35:65                          | 1.04-1.17 | 1.39-5.55 | 2.34-13.3 |       |
|          |                                                                                                                                                                                                                                                                                                                                                                |                                                              | 50:50                          | 1.05-1.71 | 1.07-12.7 | 1.21-3.19 |       |
|          |                                                                                                                                                                                                                                                                                                                                                                |                                                              | 40:60                          | 1.05-1.15 | 1.20-1.90 | 1.15-3.35 |       |
| CSP93    | 1-Phenylethanol, 1-phenyl-2-propanol, mandelonitrile, diclofop, 1-(4-hlorophenyl)-ethanol, 1,2,3,4-tetrahydro-naphthalen-1-ol, 1,3-diphenylpropane-1,3-diol, triadimenol, albendazole sulfoxide, trazodone, metalaxyl, promethazine, 1-(2-methoxyphenyl)-ethanol, 1,3-diphenylprop- 2-en-1-ol, chlorpheniramine, propranolol, metoprolol, atenolol, mexiletine | HEX:IPA:TFA:DEA                                              | 90:10:0:0                      | 1.14-1.63 | 0.58-4.65 | 0.24-5.75 | [154] |
|          |                                                                                                                                                                                                                                                                                                                                                                |                                                              | 70:30:0:0                      | 1.11-1.18 | 0.69-0.71 | 1.20-2.37 |       |
|          |                                                                                                                                                                                                                                                                                                                                                                |                                                              | 90:10:0.1:0                    | 1.10-1.17 | 0.60-1.27 | 4.86-6.01 |       |
|          |                                                                                                                                                                                                                                                                                                                                                                |                                                              | 95:5:0:0.1                     | 1.14      | 1.87      | 7.23-8.25 |       |
|          |                                                                                                                                                                                                                                                                                                                                                                |                                                              | MeOH:1%TEAA (pH 4.0) (40:60)   | 1.19-1.38 | 0.97-3.70 | 0.97-2.65 |       |
|          |                                                                                                                                                                                                                                                                                                                                                                |                                                              | MeOH:0.2% FA (35:65)           | 1.12      | 0.72      | 8.91-9.99 |       |
|          |                                                                                                                                                                                                                                                                                                                                                                |                                                              | MeOH:H <sub>2</sub> O (50:50)  | 1.16      | 3.73      | 4.13-4.79 |       |
|          |                                                                                                                                                                                                                                                                                                                                                                |                                                              | ACN:0.1% TEAA (pH 5.2) (15:85) | 1.15-1.39 | 0.65-3.10 | 0.66-2.91 |       |
| CSP94-97 | Pyrrolidine compounds                                                                                                                                                                                                                                                                                                                                          | ACN:MeOH:AcOH:TEA                                            | 480:20:0.5:1                   | 1.04-2.99 | 0.54-6.43 | 0.71-3.95 | [155] |
|          |                                                                                                                                                                                                                                                                                                                                                                |                                                              | 480:20:1:1                     | 1.02-1.82 | 0.45-3.78 | 1.13-3.32 |       |
|          |                                                                                                                                                                                                                                                                                                                                                                |                                                              | 480:20:1:0.5                   | 1.05-3.65 | 0.57-3.51 | 0.62-1.52 |       |
|          |                                                                                                                                                                                                                                                                                                                                                                | HEX:IPA                                                      | 50:50                          | 1.02-2.10 | 0.74-5.22 | 1.29-2.61 |       |
|          |                                                                                                                                                                                                                                                                                                                                                                | 75:25                                                        | 1.08-1.41                      | 0.68-5.14 | 1.37-2.67 |           |       |
|          | 90:10                                                                                                                                                                                                                                                                                                                                                          | 1.04-2.84                                                    | 2.00-9.31                      | 1.43-3.70 |           |           |       |
| CSP98    | Alprenolol, atenolol, arterenol, desmethylcizolirtine, indoprofen, glafenine, etodolac, carprofen, celiprolol, flavanone, etodolac, bufuralol, hexaconazole, pentobarbital, chlorpheniramine                                                                                                                                                                   | MeOH:H <sub>2</sub> O                                        | 65:35                          | 1.07-1.11 | 1.14-1.41 | -         | [156] |
|          |                                                                                                                                                                                                                                                                                                                                                                |                                                              | 70:30                          | 1.08      | 1.92      | -         |       |
|          |                                                                                                                                                                                                                                                                                                                                                                |                                                              | 75:25                          | 1.07      | 1.06      | -         |       |
|          |                                                                                                                                                                                                                                                                                                                                                                |                                                              | 80:20                          | 1.08-1.42 | 1.14-1.91 | -         |       |
|          |                                                                                                                                                                                                                                                                                                                                                                |                                                              | 90:10                          | 1.29-1.30 | 2.51      | -         |       |
| CSP99    | Benzoin, tyrosine, equol, ibuprofen, propranolol, praziquantel, 1-phenylethanol                                                                                                                                                                                                                                                                                | MeOH:ACN:H <sub>2</sub> O                                    | 30:30:40                       | 2.10      | 1.87      | 20.9      | [157] |
|          |                                                                                                                                                                                                                                                                                                                                                                |                                                              | 40:40:20                       | 1.81      | 1.29      | 2.92      |       |
|          |                                                                                                                                                                                                                                                                                                                                                                |                                                              | 25:25:50                       | 2.44      | 2.17      | 3.19      |       |
|          |                                                                                                                                                                                                                                                                                                                                                                | ACN:IPA (60:40)                                              | 38.8                           | 1.59      | 1.94      |           |       |
|          |                                                                                                                                                                                                                                                                                                                                                                | MeOH:ACN:H <sub>2</sub> O (0.1% ammonium acetate) (40:40:20) | 2.64                           | 1.29      | 7.20      |           |       |
|          |                                                                                                                                                                                                                                                                                                                                                                | MeOH:H <sub>2</sub> O (0.1% ammonium acetate)                | 56:44                          | 1.80      | 0.93      | 1.01      |       |
| CSP100   | Promethazine, benzoin, chlortrimeton                                                                                                                                                                                                                                                                                                                           | MeOH                                                         | 64:36                          | 2.16      | 1.56      | 1.08      | [158] |
|          |                                                                                                                                                                                                                                                                                                                                                                |                                                              | ACN:H <sub>2</sub> O (70:30)   | -         | -         | 1.59-2.50 |       |
|          |                                                                                                                                                                                                                                                                                                                                                                |                                                              |                                | -         | -         | 1.13-2.68 |       |

|          |   |   |      |      |
|----------|---|---|------|------|
| TEAA:ACN | - | - | 3.84 | 3.84 |
|          | - | - | 5.56 | 5.56 |
|          | - | - | 8.04 | 8.04 |

ACN: acetonitrile; AcOH: acetic acid; DCM: dichloromethane; DEA: diethylamine; FA: formic acid; MeOH: methanol; TEA: triethylamine; TEAA: Triethylammonium acetate; TFA: trifluoroacetic acid.

**Table S4.** Recent developments of macrocyclic-based CSPs.

| CSP        | Analytes                                                                                                                                      | Mobile phase (% <i>v/v</i> )                                | Separation factor ( $\alpha$ )                            | Resolution factor ( $R_s$ ) | Retention factor ( $k_1$ ) | Reference |           |
|------------|-----------------------------------------------------------------------------------------------------------------------------------------------|-------------------------------------------------------------|-----------------------------------------------------------|-----------------------------|----------------------------|-----------|-----------|
| CSP101     | Norleucine, alanine, valine, methionine, leucine, norvaline, threonine, serine, phenylalanine, tryptophan                                     | EtOH:H <sub>2</sub> O                                       | 80:20                                                     | 1.10-7.00                   | 0.40-5.00                  | [171]     |           |
|            |                                                                                                                                               |                                                             | 90:10                                                     | 1.20-9.40                   | 0.60-5.60                  |           |           |
|            |                                                                                                                                               | MeOH:H <sub>2</sub> O                                       | 90:10                                                     | 1.20-4.40                   | 0.60-5.00                  |           |           |
|            |                                                                                                                                               |                                                             | 50:50                                                     | 2.33                        | 0.67                       |           | 0.20-0.46 |
| CSP102     | Alanine, serine, glutamine, leucine, methionine, phenylalanine, tryptophan, haloxyfop, mandelic acid, ketorolac, sulfoxide 4, phosphine oxide | MeOH:H <sub>2</sub> O(85:15) + 20 mM AmAc                   | 1.07-3.45                                                 | 1.15-10.7                   | 2.74-22.5                  | [172]     |           |
|            |                                                                                                                                               |                                                             | ACN:H <sub>2</sub> O (85:15) + 15 mM AmAc                 | 1.18-2.83                   | 1.28-9.90                  |           | 1.06-8.96 |
|            |                                                                                                                                               |                                                             | ACN:MeOH (60:40) + 0.055% AcOH + 0.03% TEA                | 1.20-2.45                   | 2.29-9.83                  |           | 10.7-64.2 |
|            |                                                                                                                                               |                                                             | A: HEX:EtOH (95:5) B: HEX:EtOH:MeOH (50:45:5)             | 1.06-1.41                   | 0.86-6.02                  |           | 1.47-8.62 |
| CSP103-106 | Herbicides and non-steroidal anti-inflammatory drugs                                                                                          | 500 mM AmAc buffer (pH 4.5):H <sub>2</sub> O:MeOH (5:10:85) | 1.69-2.69                                                 | 2.26-3.36                   | 0.28-1.22                  | [173]     |           |
|            |                                                                                                                                               |                                                             | 500 mM AmAc buffer (pH 4.5):H <sub>2</sub> O:ACN (1:9:90) | 1.20-1.66                   | 1.27-2.85                  |           | 0.33-3.14 |
| CSP107     | Carteolol, salbutamol, clenbuterol, propanolol, acebutolol, pindolol, tertaolol, sotalol                                                      | MeOH:ACN:TEA:AcOH (85:15:0.08:0.02)                         | 1.15-1.23                                                 | 1.26-1.47                   | 0.66-2.01                  | [174]     |           |
| CSP108     | 50 Amino acids, pesticides, stimulants, and pharmaceuticals                                                                                   | MeOH:NH <sub>4</sub> formate                                | 100:0.1                                                   | 1.04-1.57                   | 0.30-2.70                  | [175]     |           |
|            |                                                                                                                                               |                                                             | 30:70 (pH 3.6 16 mM)                                      | 1.05-1.50                   | 0.60-1.90                  |           | 0.40-2.50 |
|            |                                                                                                                                               |                                                             | ACN:MeOH:AcOH:TEA (60:40:0.3:0.2)                         | 1.07-1.08                   | 0.6                        |           | 1.00-1.20 |
|            |                                                                                                                                               | HEX:EtOH:TFA:TEA (70:30:0.3:0.2)                            | 1.01-1.14                                                 | 0.20-2.10                   | 0.50-5.00                  |           |           |
| CSP109     | Benzoin                                                                                                                                       | HEX:IPA                                                     | 80:20                                                     | 3.56-4.23                   | 1.51-3.08                  | [176]     |           |
|            |                                                                                                                                               |                                                             | 50:50                                                     | 2.33                        | 0.67                       |           | 0.20-0.46 |

ACN: acetonitrile; AcOH: acetic acid; AmAc: ammonium acetate; EtOH: ethanol; HEX: *n*-hexane; IPA: 2-propanol; MeOH: methanol; NH<sub>4</sub>: ammonium; TEA: triethylamine.



**Table S5.** Recent developments of donor-acceptor or Pirkle-type CSPs.

| CSP        | Analytes                                                                                                                                                                                                                                                     | Mobile phase (% <i>v/v</i> ) | Separation factor ( $\alpha$ ) | Resolution factor ( $R_s$ ) | Retention factor ( $k_i$ ) | Reference |
|------------|--------------------------------------------------------------------------------------------------------------------------------------------------------------------------------------------------------------------------------------------------------------|------------------------------|--------------------------------|-----------------------------|----------------------------|-----------|
| CSP110     | 4-Hydroxyquinoline, quinoline, 4-methylquinoline, 4-nitroquinoline, phloroglucinol, resorcinol, phenol, 2-cresol, 3-nitrophenol, metronidazole, ronidazole, tinidazole, ornidazole, ipronidazole, 3-nitroaniline, 4-nitroaniline, 2-nitroaniline, carvedilol | MeOH:H <sub>2</sub> O        | 60:40                          | 1.91-2.08                   | 2.08-3.47                  | 1.24-7.70 |
|            |                                                                                                                                                                                                                                                              |                              | 50:50                          | 1.63-2.43                   | 0.91-4.13                  | 0.78-9.65 |
|            |                                                                                                                                                                                                                                                              |                              | 40:60                          | 1.21-1.72                   | 0.93-2.05                  | 1.84-7.38 |
|            |                                                                                                                                                                                                                                                              | HEX:IPA (90:10)              | 1.47                           | 1.75                        | 1.20-1.76                  | [196]     |
| CSP111     | Mandelic acid and 2-phenylpropionic acid                                                                                                                                                                                                                     | 0.2 M PBS                    | 2.08-2.75                      | 2.10-3.85                   | 0.71-6.00                  | [197]     |
| CSP112-115 | 1,1'-bi-2-Naphthol and benzoin                                                                                                                                                                                                                               | HEX:IPA (90:10)              | 1.14-9.80                      | 0.30-2.89                   | 0.10-34.3                  | [198]     |
| CSP116-119 | $\pi$ -Acidic, $\pi$ -basic, aromatic, and oxazolidinone compounds                                                                                                                                                                                           | HEX:IPA (90:10)              | 1.03-2.58                      | -                           | 0.63-12.3                  | [199]     |
|            |                                                                                                                                                                                                                                                              | HEX:IPA:TFA (90:10:0.1)      | 1.05-1.71                      | -                           | 2.47-8.59                  |           |
| CSP120     | 1,1'-Binaphthol, 3,5-dinitro- <i>N</i> -(1-phenylethyl) benzamide, 5-methoxy flavanone, 6-methoxy flavanone, thalidomide, 2,2,2-trifluoro-1-(9-anthryl)-ethanol                                                                                              | HEX:EtOH:TFA                 | 99:1:0.1                       | 1.03-1.12                   | -                          | 0.69-9.09 |
|            |                                                                                                                                                                                                                                                              |                              | 97:3:0.1                       | 1.12                        | -                          | 7.18      |
|            |                                                                                                                                                                                                                                                              |                              | 90:10:0.1                      | 1.05                        | -                          | 19.9      |

ACN: acetonitrile; AcOH: acetic acid; AmAc: ammonium acetate; HEX: *n*-hexane; IPA: 2-propanol; MeOH: methanol; PBS: phosphate buffer; TFA: trifluoroacetic acid.

**Table S3.** Recent developments of ion-exchange-based CSPs.

| CSP        | Analytes                                                                                                                                                                                                      | Mobile phase (% <i>v/v</i> )                 | Separation factor ( $\alpha$ ) | Resolution factor ( $R_s$ ) | Retention factor ( $k_i$ ) | Reference |
|------------|---------------------------------------------------------------------------------------------------------------------------------------------------------------------------------------------------------------|----------------------------------------------|--------------------------------|-----------------------------|----------------------------|-----------|
| CSP121-125 | Alanine, arginine, asparagine, aspartic acid, cysteine, glutamine, glutamic acid, histidine, isoleucine, leucine, lysine, methionine, phenylalanine, proline, serine, threonine, tryptophan, tyrosine, valine | 20 mM AmAc (pH 6.0) in H <sub>2</sub> O:MeOH | 85:15                          | 1.39                        | 5.04                       | 24.9-34.7 |
|            |                                                                                                                                                                                                               |                                              | 75:25                          | 1.51-4.56                   | 2.17-11.8                  | 3.00-20.8 |
|            |                                                                                                                                                                                                               |                                              | 70:30                          | 2.86                        | 9.66                       | 5.70-16.3 |
|            |                                                                                                                                                                                                               |                                              | 60:40                          | 1.12-3.70                   | 0.39-11.3                  | 2.00-27.1 |

[214]

|            |                                                                                                                                                                                |                                                                                     |                                   |           |           |           |           |
|------------|--------------------------------------------------------------------------------------------------------------------------------------------------------------------------------|-------------------------------------------------------------------------------------|-----------------------------------|-----------|-----------|-----------|-----------|
| CSP126-131 | Acidic analytes, amino acids, and anti-inflammatory profens                                                                                                                    | MeOH:0.1 M AmAc (80:20) (pH = 6.0)                                                  | 1.02-17.0                         | -         | 1.22-61.3 | [218]     |           |
|            |                                                                                                                                                                                | MeOH:AcOH (98:2) + 0.5 g/100 mL AmAc                                                | 1.04-1.24                         | 0.79-2.91 | 0.50-3.74 |           |           |
| CSP132     | anti-inflammatory profens, aryl amides, esterified DNB-amino acids, benzodiazepines, and binaphthol                                                                            | MeOH:ACN (90:10) + 0.1% (v/v) FA + 10 mM AmFm                                       | 1.05-1.25                         | 1.02-3.22 | 0.86-8.15 | [216]     |           |
|            |                                                                                                                                                                                | MeOH:ACN (50:50) + 0.2% (v/v) FA + 10 mM AmFm                                       | 1.06-1.26                         | 0.85-3.19 | 2.31-9.43 |           |           |
|            |                                                                                                                                                                                | HEX:DCM (75:25) + 2% (v/v) MeOH                                                     | 1.08-1.49                         | 0.93-7.33 | 1.28-12.1 |           |           |
|            |                                                                                                                                                                                | HEX:DCM (50:50) + 2% (v/v) MeOH                                                     | 1.18-2.06                         | 1.63-11.0 | 0.81-14.8 |           |           |
| CSP133     | <i>N</i> -acetyl-phenylalanine, <i>N</i> -carbobenzoxyphenylalanine, <i>N</i> -[(9 <i>H</i> -fluoren-9-ylmethoxy)-carbonyl]-phenylalanine, and dichlorprop                     | MeOH:AcOH:AmAc                                                                      | 98:2:0.5                          | 1.21-1.51 | 1.73-3.99 | [219]     |           |
|            |                                                                                                                                                                                |                                                                                     | 99.7:0.3:0.07                     | 1.22-1.54 | 1.81-5.20 |           | 0.95-3.50 |
|            |                                                                                                                                                                                |                                                                                     | 99.6:0.4:0.1                      | 1.48      | 4.14      |           | 1.19      |
| CSP134-137 | <i>N</i> -Acetyl-phenylalanine, <i>N</i> -[(9 <i>H</i> -Fluoren-9-ylmethoxy)carbonyl]phenylalanine, 2-(2,4-dichlorphenoxy)propionic acid, <i>N</i> -carbobenzoxy-phenylalanine | MeOH:AcOH:AmAc (98:2:0.5)                                                           | 1.18-1.66                         | 0.90-6.20 | 0.40-7.60 | [215]     |           |
|            |                                                                                                                                                                                | MeOH:H <sub>2</sub> O:AcOH:AmAc (58:40:2:0.5)                                       | 1.12-1.43                         | 1.00-5.10 | 1.10-400  |           |           |
| CSP138     | Proteinogenic amino acids                                                                                                                                                      | A: MeOH:H <sub>2</sub> O (98:2) with FA and AmFm<br>B: MeOH:H <sub>2</sub> O (98:2) | 25:75 (25 mM FA and 25 mM AmFm)   | 1.08-1.32 | 0.65-0.97 | 0.24-2.17 | [217]     |
|            |                                                                                                                                                                                |                                                                                     | 50:50 (50 mM FA and 50 mM AmFm)   | 1.11-1.55 | 0.91-4.08 | 0.51-3.17 |           |
|            |                                                                                                                                                                                |                                                                                     | 75:25 (75 mM FA and 75 mM AmFm)   | 1.08-1.48 | 0.63-2.99 | 0.47-2.65 |           |
|            |                                                                                                                                                                                |                                                                                     | 100:0 (100 mM FA and 100 mM AmFm) | 1.27      | 1.99      | 1.97-2.47 |           |
|            |                                                                                                                                                                                |                                                                                     | 99.7:0.3:0.07                     | 1.22-1.54 | 1.81-5.20 | 0.95-3.50 |           |
|            |                                                                                                                                                                                |                                                                                     | 99.6:0.4:0.1                      | 1.48      | 4.14      | 1.19      |           |
| CSP139-140 | Acidic analytes                                                                                                                                                                | MeOH:100 mM AmAc (pH = 6.0) (80:20)                                                 | 1.08-2.38                         | 1.00-13.4 | 1.20-35.8 | [220]     |           |
|            |                                                                                                                                                                                | MeOH:100 mM AmAc (pH = 7.0) (80:20)                                                 | 1.15-14.5                         | 1.30-25.5 | 1.00-23.0 |           |           |

ACN: acetonitrile; AcOH: acetic acid; AmAc: ammonium acetate; AmFm: ammonium formate; DCM: dichloromethane; FA: formic acid; HEX: *n*-hexane; MeOH: methanol.

**Table S4.** Recent developments of crown-ether-based CSPs.

| CSP        | Analytes                                                                                                                                    | Mobile phase (% v/v)           | Separation factor ( $\alpha$ ) | Resolution factor ( $R_s$ ) | Retention factor ( $k_1$ ) | Reference |       |
|------------|---------------------------------------------------------------------------------------------------------------------------------------------|--------------------------------|--------------------------------|-----------------------------|----------------------------|-----------|-------|
| CSP141     | <i>o</i> -Nitroaniline, <i>m</i> -nitroaniline, <i>p</i> -nitroaniline, <i>o</i> -nitrophenol, <i>m</i> -nitrophenol, <i>p</i> -nitrophenol | MeOH:H <sub>2</sub> O          | 100:0                          | -                           | -                          | 0.08-0.24 | [233] |
|            |                                                                                                                                             |                                | 80:20                          | -                           | -                          | 0.36-0.46 |       |
|            |                                                                                                                                             |                                | 60:40                          | -                           | -                          | 0.92-1.10 |       |
|            |                                                                                                                                             |                                | 40:60                          | -                           | -                          | 1.41-1.88 |       |
|            |                                                                                                                                             |                                | 20:80                          | -                           | -                          | 2.79-4.51 |       |
|            |                                                                                                                                             |                                | 10:90                          | -                           | -                          | 3.88-6.78 |       |
|            |                                                                                                                                             |                                | 5:95                           | -                           | -                          | 4.26-8.30 |       |
|            |                                                                                                                                             | ACN:H <sub>2</sub> O           | 100:0                          | -                           | -                          | 0.11-0.42 |       |
|            |                                                                                                                                             |                                | 80:20                          | -                           | -                          | 0.17-0.21 |       |
|            |                                                                                                                                             |                                | 60:40                          | -                           | -                          | 0.64-0.75 |       |
|            |                                                                                                                                             |                                | 40:60                          | -                           | -                          | 1.23-1.53 |       |
|            |                                                                                                                                             |                                | 20:80                          | -                           | -                          | 2.02-2.57 |       |
|            |                                                                                                                                             |                                | 10:90                          | -                           | -                          | 2.65-5.03 |       |
|            |                                                                                                                                             |                                | 5:95                           | -                           | -                          | 3.30-6.46 |       |
| CSP142     | 3,5-Dinitrobenzoyl derivative of alanine, leucine, valine, methionine; diclofop-methyl, and mandelic acid                                   | HEX:IPA:TFA                    | 85:15:0.1                      | 1.34-2.00                   | 0.93-1.43                  | 1.05-10.5 | [234] |
|            |                                                                                                                                             |                                | 99:1:0                         | 1.25                        | 0.73                       | 2.05-2.58 |       |
|            |                                                                                                                                             | H <sub>2</sub> O:MeOH:AcOH     | 90:10:0.1                      | 1.06                        | 0.37                       | 6.82-7.29 |       |
|            |                                                                                                                                             |                                | 80:20:0.1                      | 1.15                        | 0.79                       | 11.2-12.9 |       |
|            |                                                                                                                                             |                                | 70:30:0.1                      | 1.09-1.11                   | 0.35-0.40                  | 5.19-7.49 |       |
| CSP143     | Uracil, aniline, acetanilide, phenol, 4-nitrophenol, biphenyl, benzoic acid, <i>p</i> -nitrophenol                                          | ACN:40 mM AmAc (20:80)         | 1.02-2.05                      | 0.20-0.34                   | 1.82-5.06                  | [235]     |       |
|            |                                                                                                                                             | ACN:aqueous FA (40:60)         | -                              | -                           | 0.10-4.32                  |           |       |
| CSP144-154 | Aralkylamines and $\alpha$ -amino acid esters                                                                                               | ACN:AmAc (pH=5.5) (30:70)      | -                              | -                           | 0.29-4.33                  | [236]     |       |
|            |                                                                                                                                             | ACN:25 mM AmAc (20:80)         | 1.23                           | 1.20                        | 3.08-4.00                  |           |       |
| CSP155-156 | <i>N</i> -(3,5-Dinitrobenzoyl)-leucine, <i>N</i> -(3,5-dinitrobenzoyl)-valine, omeprazole, diclofop-methyl, mandelic acid, and pregabalin   | HEX:IPA:TFA                    | 90:10:0.1                      | 1.16-1.34                   | 0.60-1.65                  | 4.90-7.85 | [237] |
|            |                                                                                                                                             |                                | 95:5:0.1                       | 1.08-4.30                   | 0.22-3.93                  | 1.06-6.06 |       |
|            |                                                                                                                                             | HEX:DCM:EtOH:DEA (85:15:3:0.5) | 1.30                           | 0.48-0.89                   | 3.73-7.94                  |           |       |

|                            |                |           |           |           |
|----------------------------|----------------|-----------|-----------|-----------|
|                            | HEX:IPA (99:1) | 1.34-1.55 | 0.91-1.76 | 0.81-1.33 |
|                            | 85:15:0.1      | 1.11      | 0.38      | 5.20-5.80 |
| H <sub>2</sub> O:MeOH:AcOH | 80:20:0.1      | 1.19      | 0.45      | 6.38-7.60 |
|                            | 95:5:0.1       | 1.13      | 0.82      | 11.0-12.5 |

ACN: acetonitrile; AcOH: acetic acid; AmAc: ammonium acetate; DCM: dichloromethane; DEA: diethylamine; EtOH: ethanol; FA: formic acid; HEX: *n*-hexane; IPA: 2-propanol; MeOH: methanol; TFA: trifluoroacetic acid.

**Table S8.** Recent developments of cyclofructan-based CSPs.

| CSP        | Analytes                                                                                                      | Mobile phase (% <i>v/v</i> )           | Separation factor ( $\alpha$ ) | Resolution factor ( $R_s$ ) | Retention factor ( $k_1$ ) | Reference |
|------------|---------------------------------------------------------------------------------------------------------------|----------------------------------------|--------------------------------|-----------------------------|----------------------------|-----------|
| CSP157-166 | Thalidomide, warfarin, furoin, Tröger's base, <i>t</i> -stilbene oxide, 2-2'-binaphthol, 2,2'-binaphthylamine | HEP:EtOH                               | 70:30                          | 1.02-1.11                   | 0.50-1.10                  | 4.06-11.2 |
|            |                                                                                                               |                                        | 95:5                           | 1.05-1.11                   | 0.80-1.20                  | 0.80-1.76 |
|            |                                                                                                               |                                        | 99.5:0.5                       | 1.02-2.05                   | 0.50-6.90                  | 1.68-29.9 |
| CSP167-171 | 34 Acid, basic, and neutral analytes                                                                          | HEP:EtOH (with 0.1% TFA)               | 70:30                          | 1.05-1.17                   | 1.00-1.60                  | 1.30-5.21 |
|            |                                                                                                               |                                        | 80:20                          | 1.01-1.43                   | 0.50-3.10                  | 0.67-14.3 |
|            |                                                                                                               |                                        | 90:10                          | 1.02-1.11                   | 0.50-2.00                  | 0.39-8.26 |
|            |                                                                                                               | ACN:MeOH (with 0.3% AcOH and 0.2% TEA) | 95:5                           | 1.08-1.16                   | 1.50-2.00                  | 6.88-18.6 |
|            |                                                                                                               |                                        | 60:40                          | 1.01-1.03                   | 0.50-0.60                  | 0.78-6.12 |
|            |                                                                                                               |                                        | 80:20                          | 1.02-1.10                   | 0.60-1.00                  | 0.62-0.67 |
| CSP172     | 37 Derivatives of amines and alcohols                                                                         | ACN:MeOH:TEA:AcOH                      | 98:2                           | 1.04-1.18                   | 0.50-1.70                  | 1.25-6.19 |
|            |                                                                                                               |                                        | HEP:EtOH:TFA (70:30:0.1)       | 1.05-1.41                   | 0.20-1.40                  | 0.80-6.40 |
|            |                                                                                                               |                                        | 65:35:0.2:0.5                  | 1.02-1.32                   | 0.20-0.95                  | 0.17-4.54 |
|            |                                                                                                               |                                        | 70:30:0.2:0.5                  | 1.02-1.24                   | 0.20-1.40                  | 1.88-5.94 |
|            |                                                                                                               |                                        | 75:25:0.2:0.5                  | 1.09                        | 0.60                       | 3.66      |
|            | 80:20:0.2:0.5                                                                                                 | 1.22                                   | 1.00                           | 0.25                        |                            |           |

ACN: acetonitrile; AcOH: acetic acid; EtOH: ethanol; HEP: heptane; MeOH: methanol; TEA: triethylamine; TFA: trifluoroacetic acid.
